# Supplementary material for: Gene expression profile of peripheral blood mononuclear cells may contribute to the identification and immunological classification of breast cancer patients
Source: Springer Nature journal article supplement (doi:10.1007/s12282-018-0920-2), 2018-10-13
Supplement: MOESM3 [file 16196502]

Supplementary Table 2

Genes Shown to be at least 0.5-Fold Downregulated in PBMCs of BC Patients

| *Gene symbol* | *FDR* | *Fold change (BC/HV)* |
| --- | --- | --- |
| ROBO1 | 0.00030 | 0.247 |
| SH3RF3-AS1 | 0.031 | 0.251 |
| CD248 | 0.000094 | 0.259 |
| TRIM49L1 | 0.0078 | 0.298 |
| PIWIL2 | 0.032 | 0.311 |
| NPTXR | 0.00032 | 0.335 |
| GPRASP1 | 0.0025 | 0.338 |
| DUSP2 | 0.021 | 0.342 |
| AMIGO1 | 0.0012 | 0.346 |
| SIK1 | 0.036 | 0.366 |
| FAM115C | 0.048 | 0.374 |
| GLI1 | 0.017 | 0.376 |
| CA8 | 0.011 | 0.404 |
| ADAMTS10 | 0.028 | 0.407 |
| SNORA5B | 0.0047 | 0.412 |
| EEF2 | 0.0086 | 0.415 |
| MAP3K14-AS1 | 0.00079 | 0.426 |
| PIK3IP1 | 0.0047 | 0.436 |
| PDZD7 | 0.00066 | 0.443 |
| CCDC19 | 0.0058 | 0.453 |
| KCNIP2 | 0.0095 | 0.456 |
| FGF11 | 0.00044 | 0.457 |
| NTN5 | 0.023 | 0.465 |
| SAC3D1 | 0.0010 | 0.467 |
| ADD2 | 0.0020 | 0.468 |
| BAIAP3 | 0.0016 | 0.470 |
| FXYD7 | 0.037 | 0.472 |
| SCARNA6 | 0.047 | 0.474 |
| DUS3L | 0.0086 | 0.476 |
| ZC3H12A | 0.010 | 0.476 |
| DFNB31 | 0.00091 | 0.480 |
| TNXA | 0.027 | 0.485 |
| SNORA70F | 0.018 | 0.495 |
| LAMA5 | 0.014 | 0.497 |
| LOC727849 | 0.020 | 0.497 |
| MIR600HG | 0.0011 | 0.498 |
